# Supplementary material for: Charge control of the formation of two neutral/cationic metal–organic frameworks based on neutral/cationic triangular clusters and isonicotinic acid: structure, gas adsorption and magnetism
Source: Royal Society of Chemistry journal article supplement (doi:10.1039/c8ce00997j), 2018-01-01
Supplement: c8ce00997j1.pdf [file c8ce00997j1.pdf]

## Supporting Information

# Charge Control the Formation of Two Neutral/Cationic Metal–Organic Frameworks Based on Neutral/Cationic Triangular Clusters and Isonicotinic Acid: Structure, Gas Adsorption and Magnetism

Lei Zhou, Baolei Zhou, Zheng Cui, Bowen Qin, Xiaoying Zhang\*, Wenliang Li\* and Jingping Zhang\*

Advanced Energy Materials Research Center, Faculty of Chemistry, Northeast Normal University, Changchun 130024, P. R. China

### Corresponding Author

\* [jpzhang@nenu.edu.cn](mailto:jpzhang@nenu.edu.cn)

\* [zhangxy218@nenu.edu.cn](mailto:zhangxy218@nenu.edu.cn)

\* [liw1926@nenu.edu.cn](mailto:liw1926@nenu.edu.cn)

**Table S1.** The crystallographic data for complexes **Mn-Ac** and **Co-DMA**.

| Compound                                            | <b>Mn-Ac</b>                                                                   | <b>Co-DMA</b>                                                                                    |
|-----------------------------------------------------|--------------------------------------------------------------------------------|--------------------------------------------------------------------------------------------------|
| empirical formula                                   | C <sub>26</sub> H <sub>24</sub> N <sub>4</sub> O <sub>13</sub> Mn <sub>3</sub> | C <sub>72</sub> H <sub>104</sub> N <sub>14</sub> O <sub>40</sub> Cl <sub>2</sub> Co <sub>6</sub> |
| <i>M<sub>r</sub></i>                                | 765.30                                                                         | 2230.07                                                                                          |
| <i>T</i> (K)                                        | 293(2)                                                                         | 293(2)                                                                                           |
| Crystal system                                      | orthorhombic                                                                   | orthorhombic                                                                                     |
| Space group                                         | <i>P</i> nnm                                                                   | <i>P</i> nma                                                                                     |
| <i>a</i> (Å)                                        | 12.402                                                                         | 19.582                                                                                           |
| <i>b</i> (Å)                                        | 14.734                                                                         | 20.1291                                                                                          |
| <i>c</i> (Å)                                        | 20.85                                                                          | 12.0113                                                                                          |
| <i>α</i> (deg)                                      | 90                                                                             | 90                                                                                               |
| <i>β</i> (deg)                                      | 90                                                                             | 90                                                                                               |
| <i>γ</i> (deg)                                      | 90                                                                             | 90                                                                                               |
| <i>V</i> (Å <sup>3</sup> )                          | 3809.943                                                                       | 4734.5(4)                                                                                        |
| <i>Z</i>                                            | 4                                                                              | 2                                                                                                |
| $\rho_{\text{calcd}}$ /g cm <sup>-3</sup>           | 1.303                                                                          | 1.366                                                                                            |
| GOF                                                 | 1.125                                                                          | 1.061                                                                                            |
| <i>R</i> <sub>1</sub> [ <i>I</i> > 2σ( <i>I</i> )]  | 0.0437                                                                         | 0.0786                                                                                           |
| <i>wR</i> <sub>2</sub> [ <i>I</i> > 2σ( <i>I</i> )] | 0.1285                                                                         | 0.2356                                                                                           |

$$R_1 = \sum(|F_o| - |F_c|) / \sum |F_o|, \quad wR_2 = [\sum w(|F_o|^2 - |F_c|^2)^2 / \sum w(F_o^2)]^{1/2}.$$

**Table S2.** Selected bond lengths (Å) and angles (°) for **Mn-Ac**.

| Bond lengths [Å]    |            |                 |            |
|---------------------|------------|-----------------|------------|
| Mn(1)-O(2)#1        | 2.150(2)   | Mn(2)-O(4)      | 2.137(2)   |
| Mn(1)-O(2)          | 2.150(2)   | Mn(2)-O(3)      | 2.155(2)   |
| Mn(1)-O(1)          | 2.163(3)   | Mn(2)-O(6)      | 2.160(2)   |
| Mn(1)-O(7)          | 2.211(3)   | Mn(2)-O(1)      | 2.1608(16) |
| Mn(1)-N(2)#2        | 2.310(4)   | Mn(2)-O(5)      | 2.244(2)   |
| Mn(1)-N(3)#3        | 2.315(4)   | Mn(2)-N(1)#4    | 2.327(3)   |
| Angles [deg]        |            |                 |            |
| O(2)#1-Mn(1)-O(2)   | 164.65(13) | O(4)-Mn(2)-O(3) | 96.46(12)  |
| O(2)#1-Mn(1)-O(1)   | 96.65(7)   | O(4)-Mn(2)-O(6) | 90.39(12)  |
| O(2)-Mn(1)-O(1)     | 96.65(7)   | O(3)-Mn(2)-O(6) | 161.91(10) |
| O(2)#1-Mn(1)-O(7)   | 86.73(7)   | O(4)-Mn(2)-O(1) | 90.34(11)  |
| O(2)-Mn(1)-O(7)     | 86.73(7)   | O(3)-Mn(2)-O(1) | 97.34(9)   |
| O(1)-Mn(1)-O(7)     | 85.50(12)  | O(6)-Mn(2)-O(1) | 99.35(9)   |
| O(2)#1-Mn(1)-N(2)#2 | 92.98(7)   | O(4)-Mn(2)-O(5) | 172.18(10) |

|                     |            |                   |            |
|---------------------|------------|-------------------|------------|
| O(2)-Mn(1)-N(2)#2   | 92.98(7)   | O(3)-Mn(2)-O(5)   | 89.87(11)  |
| O(1)-Mn(1)-N(2)#2   | 96.91(13)  | O(6)-Mn(2)-O(5)   | 84.90(11)  |
| O(7)-Mn(1)-N(2)#2   | 177.59(14) | O(1)-Mn(2)-O(5)   | 84.28(11)  |
| O(2)#1-Mn(1)-N(3)#3 | 82.90(6)   | O(4)-Mn(2)-N(1)#4 | 88.31(10)  |
| O(2)-Mn(1)-N(3)#3   | 82.90(6)   | O(3)-Mn(2)-N(1)#4 | 81.35(9)   |
| O(1)-Mn(1)-N(3)#3   | 172.42(13) | O(6)-Mn(2)-N(1)#4 | 82.14(9)   |
| O(7)-Mn(1)-N(3)#3   | 86.92(14)  | O(1)-Mn(2)-N(1)#4 | 178.00(11) |
| N(2)#2-Mn(1)-N(3)#3 | 90.67(14)  | O(5)-Mn(2)-N(1)#4 | 97.21(10)  |

Symmetry Code: #1 x,y,-z; #2 -x,-y,-z; #3 x-1,y,z; #4 x+1/2,-y+1/2,-z+1/2.

**Table S3.** BVS calculations for the Mn ions in complex **Mn-Ac**.

| Atom | Mn <sup>II</sup> | Mn <sup>III</sup> | Mn <sup>IV</sup> | Mn <sup>VII</sup> |
|------|------------------|-------------------|------------------|-------------------|
| Mn1  | 2.04             | 1.93              | 1.90             | 2.04              |
| Mn2  | 2.08             | 1.94              | 1.91             | 2.08              |

**Table S4.** Selected bond lengths (Å) and angles (°) for **Co-DMA**.

| Bond lengths [Å] |           |                   |           |
|------------------|-----------|-------------------|-----------|
| Co(1)-O(2)       | 2.045(4)  | Co(2)-O(1)        | 2.079(5)  |
| Co(1)-O(4)       | 2.053(7)  | Co(2)-O(3)#1      | 2.086(4)  |
| Co(1)-O(6)       | 2.074(5)  | Co(2)-O(3)        | 2.086(4)  |
| Co(1)-O(5)       | 2.099(4)  | Co(2)-N(3)        | 2.157(7)  |
| Co(1)-O(1)       | 2.100(3)  | Co(2)-O(8)        | 2.178(7)  |
| Co(1)-O(7)       | 2.127(6)  | Co(2)-N(2)        | 2.187(6)  |
| Co(1)-N(1)       | 2.188(5)  |                   |           |
| Angles [deg]     |           |                   |           |
| O(2)-Co(1)-O(4)  | 161.3(3)  | O(5)-Co(1)-N(1)   | 84.03(18) |
| O(2)-Co(1)-O(6)  | 86.9(3)   | O(1)-Co(1)-N(1)   | 175.7(2)  |
| O(4)-Co(1)-O(6)  | 81.7(3)   | O(7)-Co(1)-N(1)   | 90.4(2)   |
| O(2)-Co(1)-O(5)  | 164.1(2)  | O(1)-Co(2)-O(3)#1 | 96.69(11) |
| O(4)-Co(1)-O(5)  | 22.8(2)   | O(1)-Co(2)-O(3)   | 96.69(11) |
| O(6)-Co(1)-O(5)  | 104.3(2)  | O(3)#1-Co(2)-O(3) | 166.5(2)  |
| O(2)-Co(1)-O(1)  | 96.66(17) | O(1)-Co(2)-N(3)   | 92.7(2)   |
| O(4)-Co(1)-O(1)  | 98.9(2)   | O(3)#1-Co(2)-N(3) | 90.60(13) |
| O(6)-Co(1)-O(1)  | 93.8(2)   | O(3)-Co(2)-N(3)   | 90.60(13) |

|                 |           |                   |           |
|-----------------|-----------|-------------------|-----------|
| O(5)-Co(1)-O(1) | 93.85(18) | O(1)-Co(2)-O(8)   | 86.8(2)   |
| O(2)-Co(1)-O(7) | 93.8(3)   | O(3)#1-Co(2)-O(8) | 89.46(13) |
| O(4)-Co(1)-O(7) | 97.8(3)   | O(3)-Co(2)-O(8)   | 89.46(13) |
| O(6)-Co(1)-O(7) | 179.1(2)  | N(3)-Co(2)-O(8)   | 179.5(2)  |
| O(5)-Co(1)-O(7) | 75.2(2)   | O(1)-Co(2)-N(2)   | 176.4(2)  |
| O(1)-Co(1)-O(7) | 85.4(2)   | O(3)#1-Co(2)-N(2) | 83.26(11) |
| O(2)-Co(1)-N(1) | 84.67(17) | O(3)-Co(2)-N(2)   | 83.26(11) |
| O(4)-Co(1)-N(1) | 80.6(2)   | N(3)-Co(2)-N(2)   | 90.9(3)   |
| O(6)-Co(1)-N(1) | 90.3(2)   | O(8)-Co(2)-N(2)   | 89.6(3)   |

Symmetry Code: #1 x,-y+1/2,z.

**Table S5.** BVS calculations for the Co ions in complex Co-DMA.

| Atom | Co <sup>II</sup> | Co <sup>III</sup> |
|------|------------------|-------------------|
| Co1  | 2.14             | 2.18              |
| Co2  | 2.09             | 2.12              |

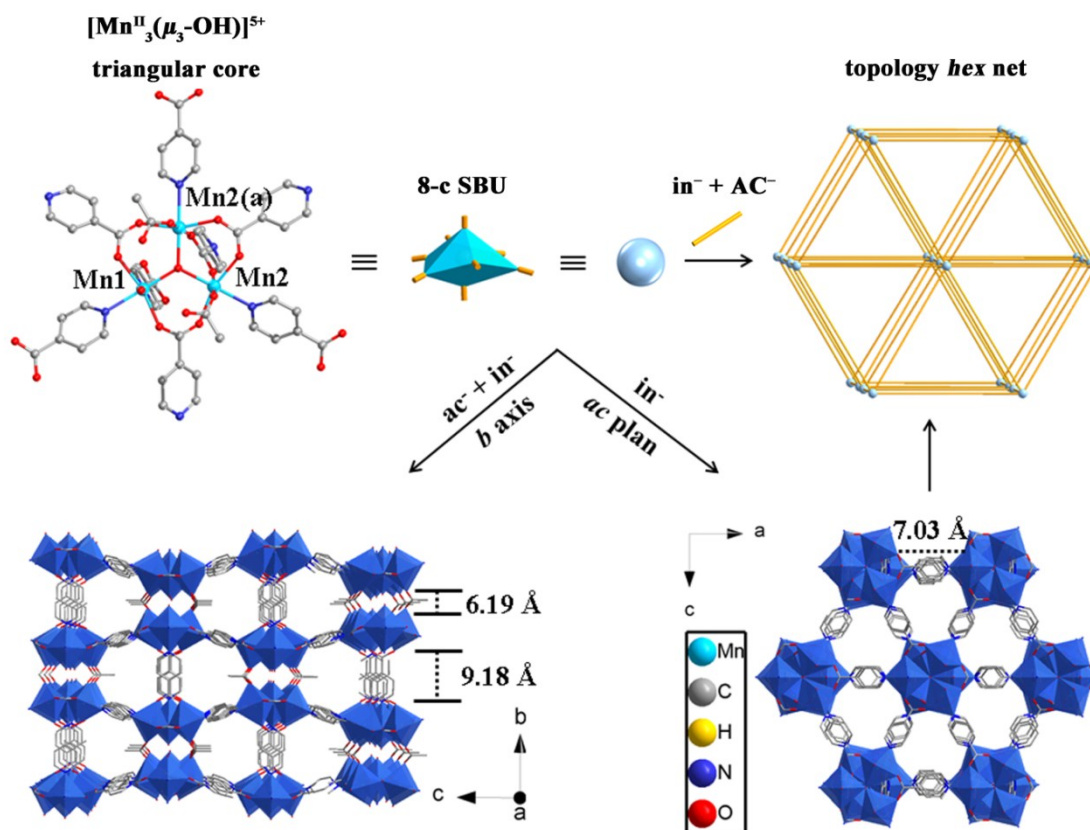

**Fig. S1** View of the coordination environment of [Mn<sub>3</sub>-CH<sub>3</sub>COO<sup>-</sup>] triangular core. The [Mn<sub>3</sub>-CH<sub>3</sub>COO<sup>-</sup>] units, acting as 8-connected nodes, are interlinked by a double-CH<sub>3</sub>COO<sup>-</sup> and a double-in<sup>-</sup> linkers above and below the *ac* plane, respectively and six in<sup>-</sup> linkers in *ac* plane to form a 3D open framework Mn-Ac with 8-connected *hex* topology. H atoms are omitted for clarity. Symmetry Code: a x,y,-z.

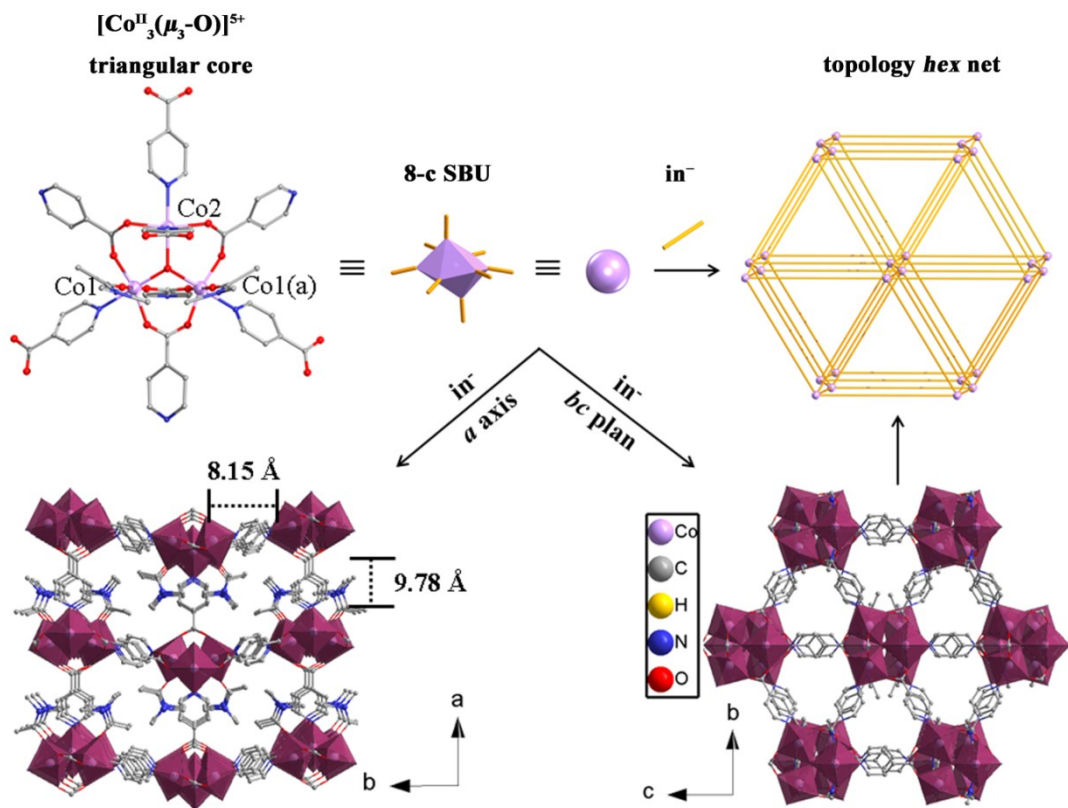

**Fig. S2** View of the coordination environment of [Co<sub>3</sub>-DMA] triangular core. The [Co<sub>3</sub>-DMA] units, acting as 8-connected nodes, are interlinked by eight in<sup>-</sup> linkers to form a 3D open framework **Co-DMA** with 8-connected *hex* topology. H atoms are omitted for clarity. Symmetry Code: a x,0.5-y,z.

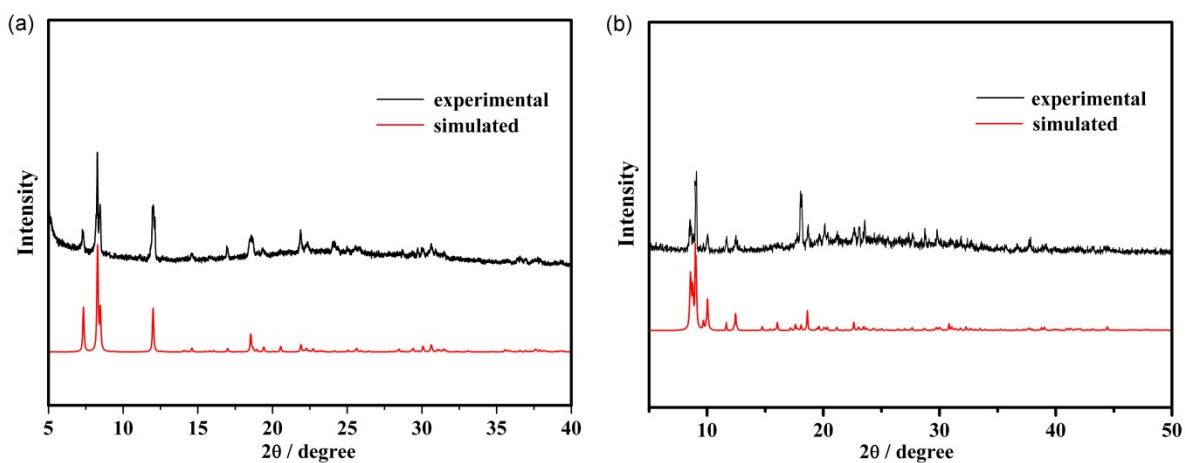

**Fig. S3** The PXRD patterns of **Mn-Ac** (a) and **Co-DMA** (b).

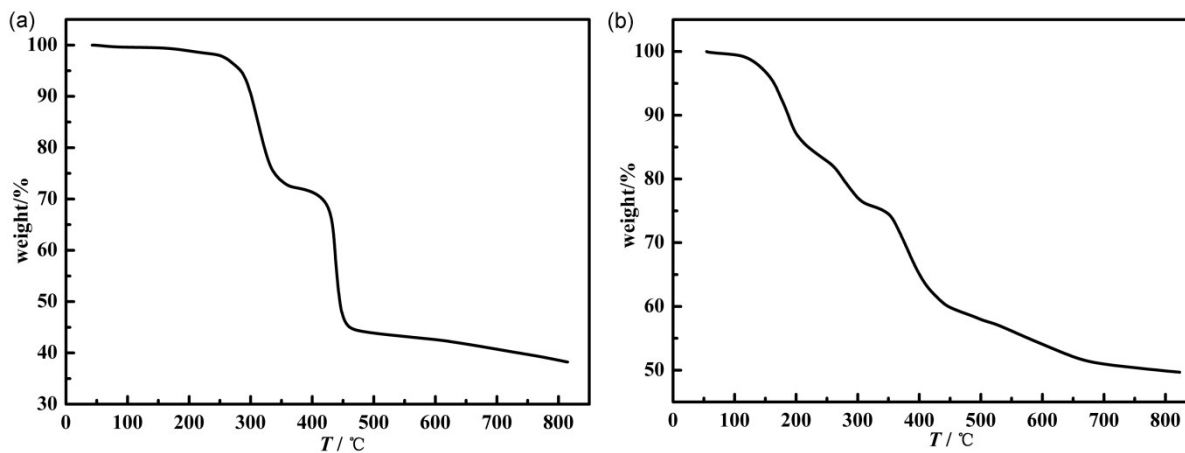

Fig. S4 The TGA curves of **Mn-Ac** (a) and **Co-DMA** (b).

### Sorption properties

The as-synthesized **Mn-Ac** and **Co-DMA** (~100 mg) samples were washed three times with EtOH/MeCN and DMA, respectively. After that, they were placed in 20 ml vial without sealed caps and were heated under vacuum at 85°C for 24 h. Before the adsorption measurements, the samples were dried through the “degas” function of the adsorption instrument for 12 h at 100°C.

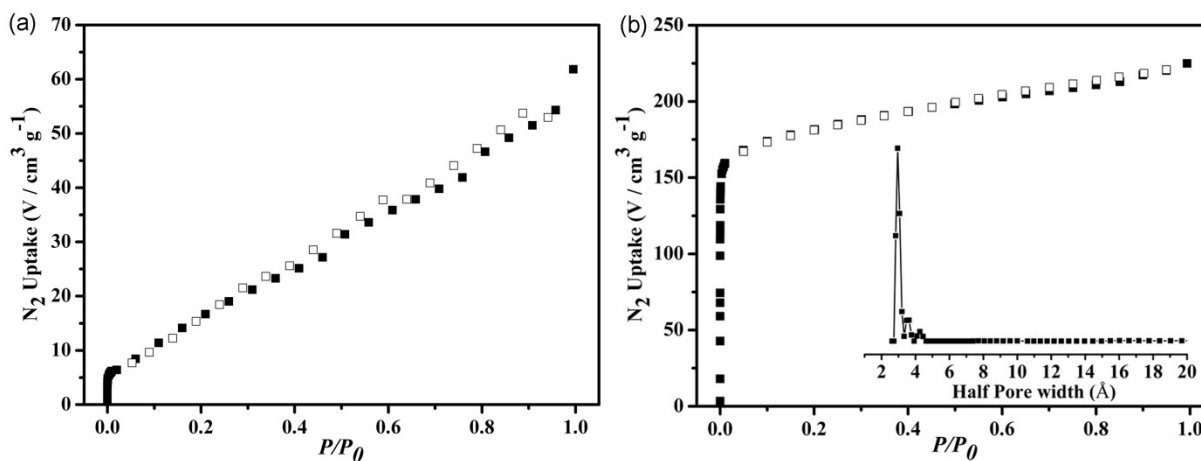

Fig. S5 (a)  $N_2$ -adsorption isotherms at 77 K for **Mn-Ac** (a) and **Co-DMA** (b). Filled and open symbols represent adsorption and desorption branches respectively. (Inset) Pore size distribution analyzed by DFT methods.

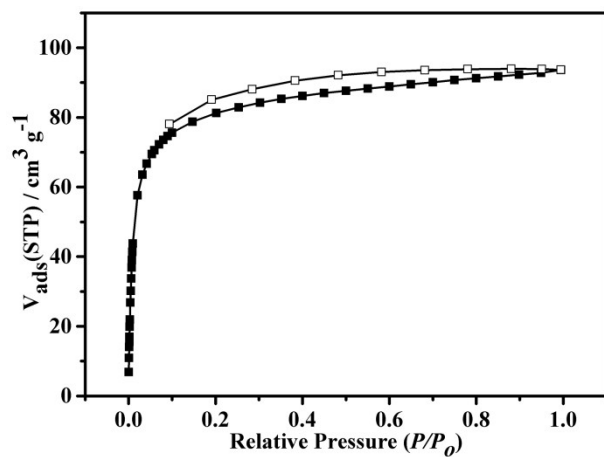

Fig. S6 CO<sub>2</sub> sorption isotherm of Mn-Ac at 195 K.

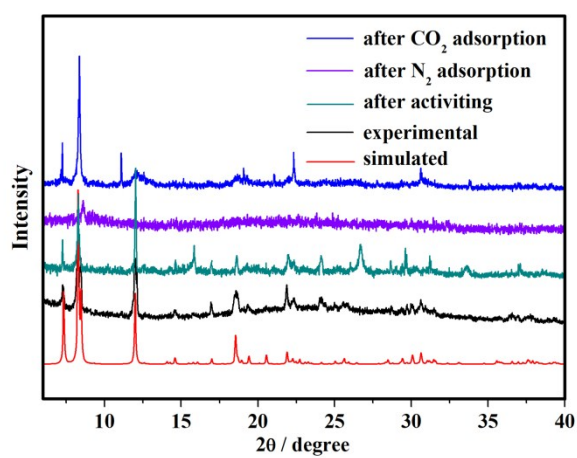

Fig. S7 (a) The PXRD patterns of Mn-Ac after an activation process and samples are measured with CO<sub>2</sub> and N<sub>2</sub>.

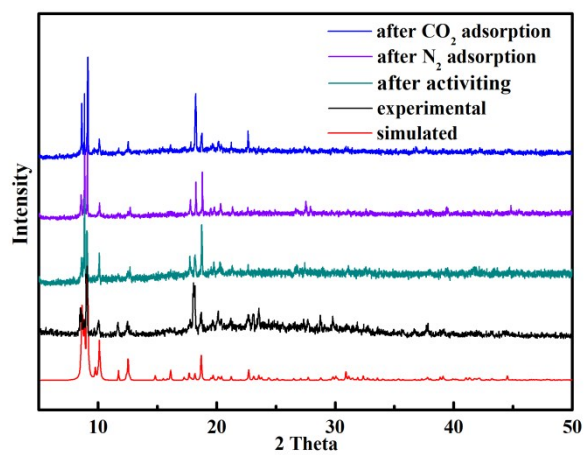

Fig. S8 (a) The PXRD patterns of Co-DMA after an activation process and after samples are measured with CO<sub>2</sub> and N<sub>2</sub>.

## CO<sub>2</sub>/CH<sub>4</sub> and CO<sub>2</sub>/N<sub>2</sub> Selectivity Prediction via Henry's law

The experimental isotherm data for pure CO<sub>2</sub>, CH<sub>4</sub> and N<sub>2</sub> were fitted using a Single-site Langmuir model:

$$V_{ads}^i = \frac{V_{1i}K_{1i}P}{1 + K_{1i}P}$$

Where  $V_{ads}$  is the total amount adsorbed in cm<sup>3</sup> g<sup>-1</sup>,  $P$  is the applied pressure in atm,  $V_i$  is the saturation capacity in cm<sup>3</sup> g<sup>-1</sup>, and  $K_i$  is the Langmuir affinity constant expressed in atm<sup>-1</sup>. The fitting of the isotherm models was achieved by calculating the  $K_i$  and  $V_i$  parameters.

Selectivity at low coverage was calculated using the results of the single-site Langmuir fits of the experimental isotherms, by determining the Henry constants for each gas (Table S7 and S7) based on the equation:

$$H_i = \sum K_i V_i$$

The selectivity at zero pressure is then calculated with the relation:

$$S_{1,2} = \frac{H_1}{H_2}$$

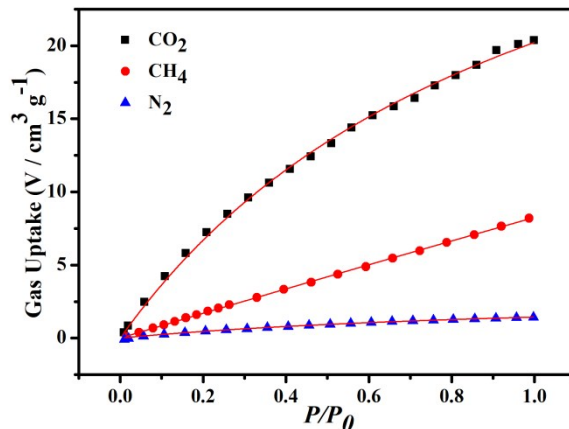

**Fig. S9** Adsorption isotherms of CO<sub>2</sub>, CH<sub>4</sub> and N<sub>2</sub> recorded at 298 K for compound **Mn-Ac**. Solid lines represent fitting curves using a single-site Langmuir model.

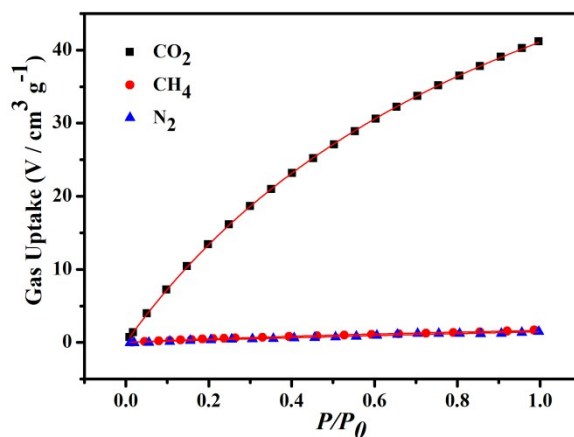

**Fig. S10** Adsorption isotherms of CO<sub>2</sub>, CH<sub>4</sub> and N<sub>2</sub> recorded at 298 K for compound **Co-DMA**. Solid lines represent fitting curves using a single-site Langmuir model.



**Table S6.** Summary of the gas uptake at 298 K under 1 atm for the two MOFs **Mn-Ac** and **Co-DMA**.

|               | CO <sub>2</sub><br>cm <sup>3</sup> g <sup>-1</sup> | CH <sub>4</sub><br>cm <sup>3</sup> g <sup>-1</sup> | N <sub>2</sub><br>cm <sup>3</sup> g <sup>-1</sup> |
|---------------|----------------------------------------------------|----------------------------------------------------|---------------------------------------------------|
| <b>Mn-Ac</b>  | 20.37                                              | 8.14                                               | 1.43                                              |
| <b>Co-DMA</b> | 41.18                                              | 1.44                                               | 1.45                                              |

**Table S7.** Fit parameters for the CO<sub>2</sub> and CH<sub>4</sub> isotherms of compound **Mn-Ac** at 298 K and selectivity.

| <b>Mn-Ac</b> | CO <sub>2</sub> | CH <sub>4</sub> | N <sub>2</sub> | CO <sub>2</sub> /CH <sub>4</sub> selectivity <sup>c</sup> | CO <sub>2</sub> /N <sub>2</sub> selectivity <sup>c</sup> |
|--------------|-----------------|-----------------|----------------|-----------------------------------------------------------|----------------------------------------------------------|
| $V_i^a$      | 40.90           | 259.39          | 3.12           | 4.7                                                       | 15.1                                                     |
| $K_i^b$      | 0.978           | 0.03            | 0.85           |                                                           |                                                          |

<sup>a</sup> Saturation uptakes and <sup>b</sup> affinity constants estimated from a single Langmuir site model; <sup>c</sup> Selectivity estimated from the ratio of the Henry constant (= ratio of the initial slopes) at 298 K.

**Table S8.** Fit parameters for the CO<sub>2</sub> and CH<sub>4</sub> isotherms of compound **Co-DMA** at 298 K and selectivity.

| <b>Co-DMA</b> | CO <sub>2</sub> | CH <sub>4</sub> | N <sub>2</sub> | CO <sub>2</sub> /CH <sub>4</sub> selectivity <sup>c</sup> | CO <sub>2</sub> /N <sub>2</sub> selectivity <sup>c</sup> |
|---------------|-----------------|-----------------|----------------|-----------------------------------------------------------|----------------------------------------------------------|
| $V_i^a$       | 85.39           | 4.37            | 11.64          | 30.8                                                      | 48.7                                                     |
| $K_i^b$       | 0.929           | 0.589           | 0.14           |                                                           |                                                          |

<sup>a</sup> Saturation uptakes and <sup>b</sup> affinity constants estimated from a single Langmuir site model; <sup>c</sup> Selectivity estimated from the ratio of the Henry constant (= ratio of the initial slopes) at 298 K.

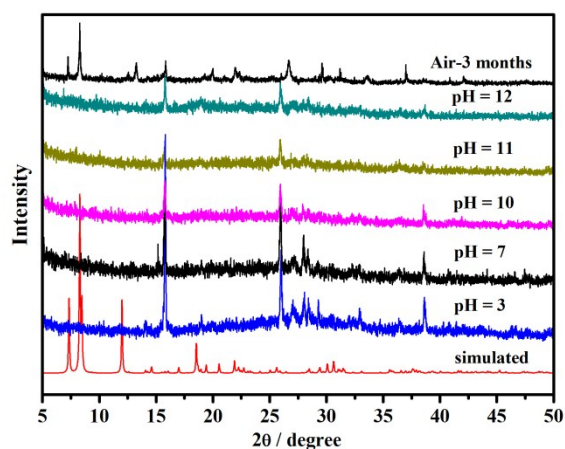**Fig. S11** The PXRD patterns of **Mn-Ac** after samples are soaked in aqueous, acidic or basic solutions for 1 h and under air condition at room temperature.

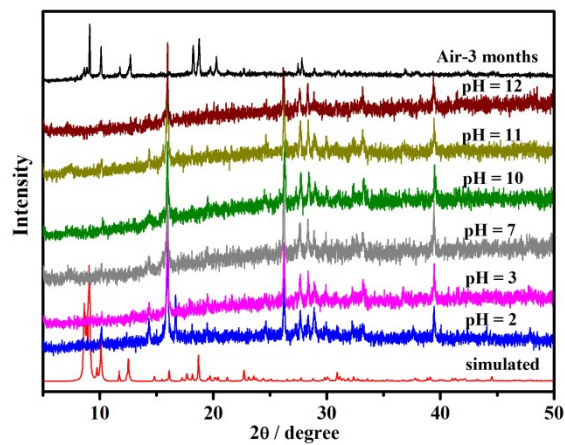

**Fig. S12** The PXRD patterns of Co-DMA after samples are soaked in aqueous, acidic or basic solutions for 1 h and under air condition at room temperature.

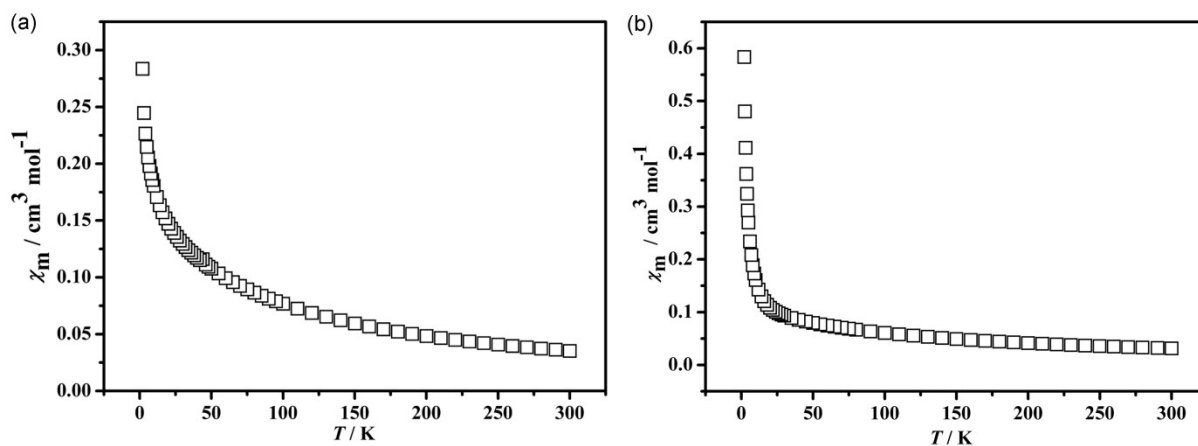

**Fig. S13** The temperature dependence of  $\chi_m$  curves for Mn-Ac (a) and Co-DMA (b) under a static field of 1000 Oe.

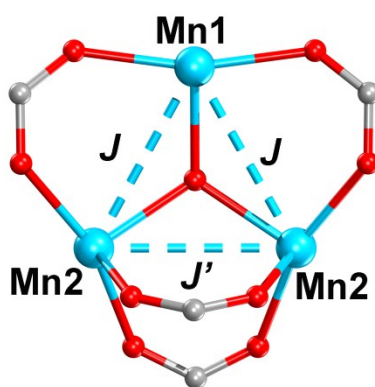

**Fig. S14** Geometrical model of complex Mn-Ac.

## Equation.

Theoretical expression for  $\chi_m$  derived from van Vleck equation with the simplified Heisenberg Hamiltonian. The equation (1) is used for the analysis of complex **Mn-Ac**.

$$\chi_m T = \frac{0.125 \times p_1 \times p_1 \times [52.5 \times \exp(8.75 \times p_2/x) + 15 \times \exp(1.75 \times p_2/x + 2 \times p_3/x) + 52.5 \times \exp(6.75 \times p_2/x + 2 \times p_3/x) + 126 \times \exp(13.75 \times p_2/x + 2 \times p_3/x) + 1.5 \times \exp(-5.25 \times p_2/x + 6 \times p_3/x) + 15 \times \exp(-2.25 \times p_2/x + 6 \times p_3/x) + 52.5 \times \exp(2.75 \times p_2/x + 6 \times p_3/x) + 126 \times \exp(9.75 \times p_2/x + 6 \times p_3/x) + 247.5 \times \exp(18.75 \times p_2/x + 6 \times p_3/x) + 1.5 \times \exp(-11.25 \times p_2/x + 12 \times p_3/x) + 15 \times \exp(-8.25 \times p_2/x + 12 \times p_3/x) + 52.5 \times \exp(-3.25 \times p_2/x + 12 \times p_3/x) + 126 \times \exp(3.75 \times p_2/x + 12 \times p_3/x) + 247.5 \times \exp(12.75 \times p_2/x + 12 \times p_3/x) + 429 \times \exp(23.75 \times p_2/x + 12 \times p_3/x) + 15 \times \exp(-16.25 \times p_2/x + 20 \times p_3/x) + 52.5 \times \exp(-11.25 \times p_2/x + 20 \times p_3/x) + 126 \times \exp(-4.25 \times p_2/x + 20 \times p_3/x) + 247.5 \times \exp(4.75 \times p_2/x + 20 \times p_3/x) + 429 \times \exp(15.75 \times p_2/x + 20 \times p_3/x) + 682.5 \times \exp(28.75 \times p_2/x + 20 \times p_3/x) + 52.5 \times \exp(-21.25 \times p_2/x + 30 \times p_3/x) + 126 \times \exp(-14.25 \times p_2/x + 30 \times p_3/x) + 247.5 \times \exp(-5.25 \times p_2/x + 30 \times p_3/x) + 429 \times \exp(5.75 \times p_2/x + 30 \times p_3/x) + 682.5 \times \exp(18.75 \times p_2/x + 30 \times p_3/x) + 1020 \times \exp(33.75 \times p_2/x + 30 \times p_3/x)]}{[6 \times \exp(8.75 \times p_2/x) + 4 \times \exp(1.75 \times p_2/x + 2 \times p_3/x) + 6 \times \exp(6.75 \times p_2/x + 2 \times p_3/x) + 8 \times \exp(13.75 \times p_2/x + 2 \times p_3/x) + 2 \times \exp(-5.25 \times p_2/x + 6 \times p_3/x) + 4 \times \exp(-2.25 \times p_2/x + 6 \times p_3/x) + 6 \times \exp(2.75 \times p_2/x + 6 \times p_3/x) + 8 \times \exp(9.75 \times p_2/x + 6 \times p_3/x) + 10 \times \exp(18.75 \times p_2/x + 6 \times p_3/x) + 2 \times \exp(-11.25 \times p_2/x + 12 \times p_3/x) + 4 \times \exp(-8.25 \times p_2/x + 12 \times p_3/x) + 6 \times \exp(-3.25 \times p_2/x + 12 \times p_3/x) + 8 \times \exp(3.75 \times p_2/x + 12 \times p_3/x) + 10 \times \exp(12.75 \times p_2/x + 12 \times p_3/x) + 12 \times \exp(23.75 \times p_2/x + 12 \times p_3/x) + 4 \times \exp(-16.25 \times p_2/x + 20 \times p_3/x) + 6 \times \exp(-11.25 \times p_2/x + 20 \times p_3/x) + 8 \times \exp(-4.25 \times p_2/x + 20 \times p_3/x) + 10 \times \exp(4.75 \times p_2/x + 20 \times p_3/x) + 12 \times \exp(15.75 \times p_2/x + 20 \times p_3/x) + 14 \times \exp(28.75 \times p_2/x + 20 \times p_3/x) + 6 \times \exp(-21.25 \times p_2/x + 30 \times p_3/x) + 8 \times \exp(-14.25 \times p_2/x + 30 \times p_3/x) + 10 \times \exp(-5.25 \times p_2/x + 30 \times p_3/x) + 12 \times \exp(5.75 \times p_2/x + 30 \times p_3/x) + 14 \times \exp(18.75 \times p_2/x + 30 \times p_3/x) + 15 \times \exp(33.75 \times p_2/x + 30 \times p_3/x)]} + p_4 x \quad (1)$$

$p_1$ --- $g$ ;  $p_2$ --- $J/k_B$   $p_3$ --- $J'/k_B$   $p_4$ --- $\chi_{TIP}$   $x$ --- $T$

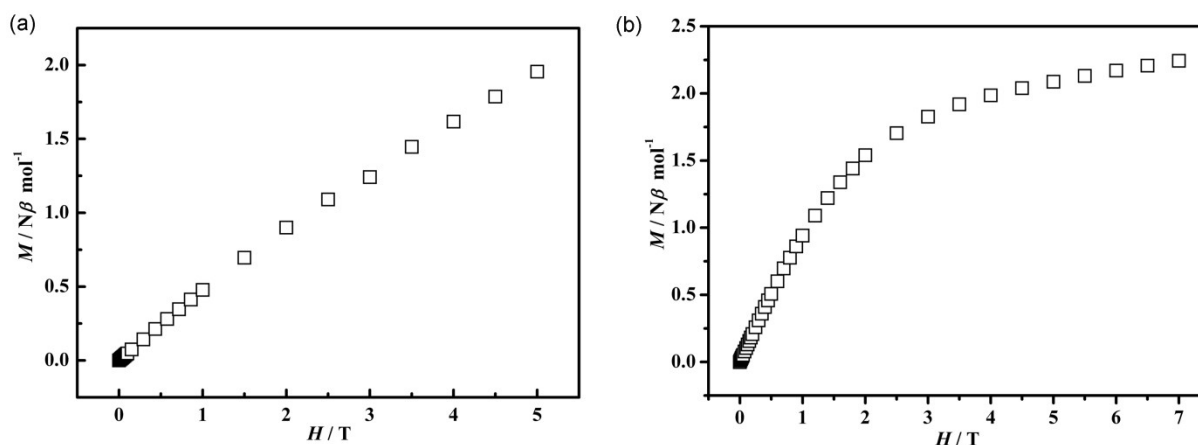

Fig. S15 The field dependence of magnetization curves for **Mn-Ac** (a) and **Co-DMA** (b) at 2 K.

## References

- (1) (a) G. M. Sheldrick. SHELXL-97, Program for Crystal Structure Refinement, University of Göttingen, Göttingen (Germany), **1997**;  
 (b) G. M. Sheldrick, SHELXS-97, Program for Crystal Structure Solution, University of Göttingen, Göttingen (Germany), **1997**;  
 (c) G. M. Sheldrick. *Acta Crystallogr., Sect. A: Found. Crystallogr.* **2008**, *64*, 112–122.
